# Supplementary material
Source: Springer Nature journal article supplement (https://www.springermedizin.de/resource/supplementary/13058_2011_2982_MOESM3_ESM.pdf/9702998)

**A**

MDA-MB-231

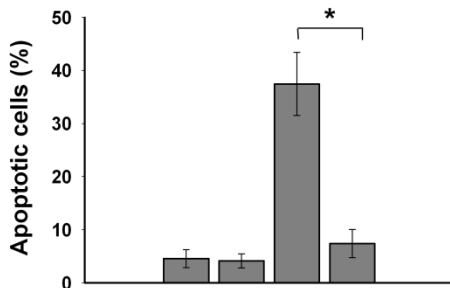

MDA-MB-468

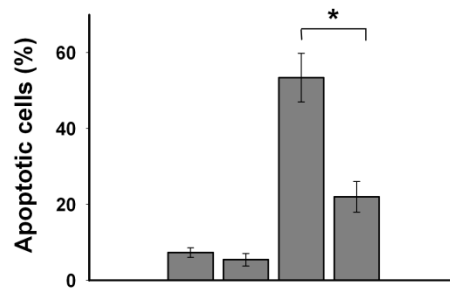

Bortezomib (500nM) - - + +

CIP2A-myc - + - +

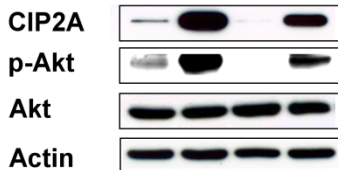

Bortezomib (500nM) - - + +

CIP2A-myc - + - +

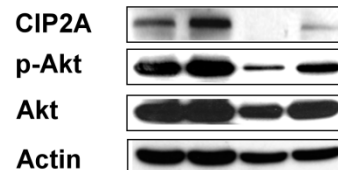**B**

MCF 7

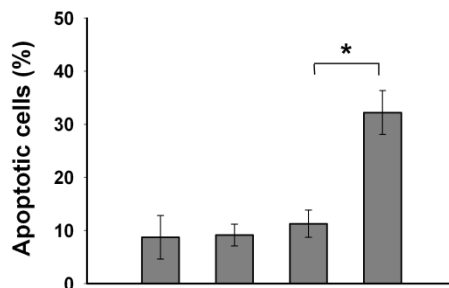

Bortezomib (1000nM) - - + +

CIP2A (SiRNA) - + - +

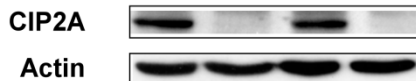

Supplement: MOESM3 [file 9702998]
